# Supplementary material
Source: Preprints.org preprint supplement (doi:10.20944/preprints201912.0277.v1)
Supplement: Supplementary file 1 [file supplementary]

## Sheet: TableS1
Table S1. Main table of density of the phytoplankton in all the samples studied
			DATE OF SAMPLE	May 8, 2017				Jun 25, 2017				Sep 1. 2017		Oct 21, 2017					Oct 28, 2017				Dec 9, 2017
KINGDOM	CLASS	LIFE STYLE	TAXON POINT	P1	P4	P5	P6	P1	P2	P3	P4	P1	P2	P1	P2	P3	P4	P5	P1	P2	P3	P4	P1	P2	P3	P4	P5
Chromist	Bacillariophyceae	Unicellular	Achnanthes sp. Bory, 1822	0	0	0	0	0	4.39246	0	0	0	0	0	0	0	0	0	0	0	0	0	0	0	0	0	0
Chromist	Bacillariophyceae	Unicellular	Achnanthidium minutissimum (Kützing) Czarnecki, 1994	0	5.68976	0	0	0.151259	0	1.89674	0	0	10.4321	0	0	0	0	0	0	0	0	0	0	2.60802	0	0	0
Chromist	Bacillariophyceae	Unicellular	Amphora veneta Kützing, 1844	0	0	0	0	2.08642	0	1.89674	0	0	10.4321	0	0	0	0	0	0	3.12963	0	1.04321	0	0	0	0	0
Chromist	Bacillariophyceae	Unicellular	Aulacodiscus sp. C.G. Ehrenberg, 1844	0	0	0	0	0.151259	0	0	0	0	0	0	0	0	0	0	0	0	0	0	0	0	0	0	0
Chromist	Bacillariophyceae	Unicellular	Aulacoseira sp. Thwaites, 1848	0	0	0	0	0	1.09812	0.948372	0	0	0	0	0	0	0	0	0	0	0	0	0	0	0	0	0
Chromist	Bacillariophyceae	Unicellular	Bacteriastrum delicatulum Cleve, 1897	0.403358	0	0	0	0	0	0	0	0	0	0	0	0	0	0	0	0	0	0	0	0	0	0	0
Chromist	Bacillariophyceae	Colonial	Chaetoceros muelleri Lemmermann, 1898	284.488	182.072	22.759	20.2622	225.333	0	0	9.38889	0	0	130.98	0	0	105.176	122.577	0	0	6.25926	5.21605	0	0	122.34	108.957	0
Chromist	Bacillariophyceae	Colonial	Chaetoceros sp. C.G. Ehrenberg, 1844	0	0	0	0	0	0	0	0	194.89	0	0	0	0	9.78009	0	175.449	0	0	0	527.88	0	0	0	0
Chromist	Bacillariophyceae	Unicellular	Cocconeis sp. C.G. Ehrenberg, 1837	0	0	0	0	0	6.58869	0	0	2.37093	0	0	0	0	0	0	0	6.25926	2.08642	4.17284	0	2.60802	0	0	2.08642
Chromist	Bacillariophyceae	Unicellular	Coscinodiscus centralis Ehrenberg, 1844	1.31091	0.984397	0.450378	1.39615	0.151259	0	0.948372	0	0	0	0	0	0	0	0	0	0	0	1.04321	0	0	0	0	0
Chromist	Bacillariophyceae	Unicellular	Cyclotella glomerata H.Bachmann, 1911	819.325	176.382	261.729	108.156	6.25926	39.5322	10.4321	37.5555	37.9349	2232.47	172.13	119.969	82.3586	21.1902	91.2808	101.95	198.21	192.994	84.5	94.74	22.1682	16.4713	40.5693	35.4691
Chromist	Bacillariophyceae	Unicellular	Cyclotella meneghiniana Kützing, 1844	0	0.328132	0.225189	2.26289	0	2.19623	3.79349	7.30247	11.65	31.2963	0	15.6481	4.39246	0	0	21.3384	18.7778	15.6481	2.08642	22.94	50.8565	27.012	34.3903	60.5062
Chromist	Bacillariophyceae	Unicellular	Cylindrotheca closterium (Ehrenberg) Reimann & J.C.Lewin, 1964	1.99	0	0	33.7566	4.17284	4.39246	0.948372	2.08642	30.27	62.5926	17.28	179.084	14.2755	0.991476	23.6576	30.9	179.432	205.512	303.574	28.35	2.60802	5.10396	6.11539	2.08642
Chromist	Bacillariophyceae	Unicellular	Cymbella sp. C.A. Agardh, 1830	0	0	0	0	2.08642	0	0	0	2.37093	0	0	0	0	0	0	0	0	0	0	0	0	0	0	0
Chromist	Bacillariophyceae	Unicellular	Diploneis interrupta (Kützing) Cleve, 1894	0	0	0	0.176469	0	0	0	0	0	0	0	0	0	0	0	0	0	0	0	0	0	0	0	0
Chromist	Bacillariophyceae	Unicellular	Fragilariopsis sp. F. Hustedt in A. Schmidt et al., 1913	0	0	0	0	0	0	0	0	2.37093	0	0	0	0	0	0	0	0	0	0	0	0	0	0	0
Chromist	Bacillariophyceae	Unicellular	Halamphora veneta (Kützing) Levkov, 2009	0	0	0	2.08642	0	0	0	0	0	0	0	0	0	0	0	0	0	0	0	0	0	0	0	0
Chromist	Bacillariophyceae	Unicellular	Hantzschia amphioxys (Ehrenberg) Grunow in Cleve & Grunow, 1880	0	0	0	2.08642	0	0	0	3.12963	0	31.2963	0	0	0	0	0	0	0	0	0	0	0	0	0	0
Chromist	Bacillariophyceae	Unicellular	Navicula sp. 1 J.B.M. Bory de Saint-Vincent, 1822	2.01679	0	0	0	25.037	0	0	0	26.0802	0	0	0	0	0	0	2.37093	0	0	0	0	0	0	0	0
Chromist	Bacillariophyceae	Unicellular	Navicula sp. 2 J.B.M. Bory de Saint-Vincent, 1822	0	0	0	0	25.037	0	0	0	16.77	0	0	0	0	0	0	0	0	0	0	0	0	0	0	0
Chromist	Bacillariophyceae	Unicellular	Navicula sp. 3 J.B.M. Bory de Saint-Vincent, 1822	0	0	0	0	7.53	0	0	0	130.72	0	0	0	0	0	0	0	0	0	0	0	0	0	0	0
Chromist	Bacillariophyceae	Unicellular	Nitzschia longissima (Brébisson) Ralfs, 1861	234.23	47.2356	22.759	10.0948	6.25926	5.49058	0	0	104.321	20.8642	720.73	22.6029	3.29435	57.1406	286.883	403.058	37.5555	28.1667	17.7346	83.97	3.91204	11.7184	14.8685	8.34568
Chromist	Bacillariophyceae	Unicellular	Nitzschia panduriformis W.Gregory, 1857	0	0	0	2.43936	0	0	0	0	0	0	0	0	0	0	0	0	0	1.04321	0	0	0	0	0	0
Chromist	Bacillariophyceae	Unicellular	Pinnularia sp. 1 C.G. Ehrenberg, 1843	0.705876	0	0	0	22.9506	7.68681	0	0	4.56	20.8642	0	5.21605	0	0	0	0	3.12963	0	2.08642	0	0	0	0	0
Chromist	Bacillariophyceae	Unicellular	Pinnularia sp. 2 C.G. Ehrenberg, 1843	0	0	0	0	0	0	0	0	7.11279	0	0	0	0	0	0	0	0	0	0	0	0	0	0	0
Chromist	Bacillariophyceae	Unicellular	Pseudo-nitzschia delicatissima (Cleve) Heiden, 1928	0	0	0	0	0	0	0	0	2.37093	0	0	0	0	0	0	0	0	0	0	0	0	0	0	0
Chromist	Bacillariophyceae	Unicellular	Fragilaria sp. H.C. Lyngbye, 1819	0	0	0	0	0	0	0	0	5.54737	0	8.34568	0	0	0	0	0	0	0	0	0	0	0	0	0
Chromist	Bacillariophyceae	Unicellular	Other small pennate diatoms	0	0	0	5.21605	0	43.9246	15.174	13.5617	15.8822	83.4568	0	0	0	0	0	0	2.08642	1.04321	0	0	0	0	0	0
Chromist	Chrysophyceae	Unicellular	Calycomonas sp. Lohmann, 1908	0	5.68976	0	0	0	133.97	40.78	31.2963	0	3233.95	0	83.4568	71.3775	0	0	0	578.981	717.728	992.092	0	863.256	0	0	1372.86
Chromist	Chrysophyceae	Unicellular	Nanoplanktonic Chrysophyceae	5723.89	0	0	2332.62	29.2099	183.385	103.373	1098.5	68.2759	2649.75	0	0	38.434	84.7608	61.8434	0	0	0	0	0	0	32.2447	162.277	0
Chromist	Chrysophyceae	Unicellular	Dinobryon borgei Lemmermann, 1904	11.3795	0	11.3795	2.08642	0	0	0	0	0	0	0	0	0	0	0	0	0	0	0	0	0	0	0	0
Chromist	Chrysophyceae	Unicellular	Dinobryon sp. Ehrenberg, 1834	1.78777	0	0	0	0	0	0	0	0	0	0	0	0	0	0	0	0	0	0	0	0	0	0	0
Chromist	Chrysophyceae	Unicellular	Mallomonas sp. Perty, 1852	11.3795	5.68976	0.225189	0	0	0	0	0	0	0	0	0	0	0	0	0	0	0	0	0	0	0	0	0
Chromist	Chrysophyceae	Unicellular	Ochromonas sp. Vysotskii [Wysotzki, Wyssotzki], 1887	0	5.68976	0	0	0	0	0	0	0	0	0	0	0	0	0	0	0	0	0	0	0	0	0	0
Chromist	Chrysophyceae	Unicellular	Ollicola vangoorii (W.Conrad) Vørs, 1992	22.759	0	0	0	0	272.333	82.5084	92.8457	0	0	0	8.69341	0	0	0	0	26.0802	23.9938	1.04321	0	29.9923	0	0	39.642
Chromist	Chrysophyceae	Unicellular	Chrysophyceae cysts	0	0	0	0	0	0	0	0	0	0	0	0	0	32.6003	208.642	0	0	0	0	0	0	407.8	707.064	0
Chromist	Cryptophyceae	Unicellular	Cryptomonas marssonii Skuja, 1948	56.8976	5.68976	0.450378	3.3061	0	2.19623	0	0	0	0	0	0	5.49058	25.1725	12.4801	0	57.3765	51.1173	46.9444	0	6.52006	0	0	8.34568
Chromist	Cryptophyceae	Unicellular	Leucocryptos marina (Braarud) Butcher, 1967	0	0	0	0	0	0	0	0	16.36	0	0	0	0	0	0	0	0	0	0	0	0	0	0	0
Chromist	Cryptophyceae	Unicellular	Leucocryptos sp. Butcher, 1967	0	0	0	0	0	4.39246	2.84512	11.4753	2.37093	0	0	8.69341	0	0	0	0	0	3.12963	7.30247	0	0	0	0	0
Chromist	Cryptophyceae	Unicellular	Plagioselmis lacustris (Pascher & Ruttner) Javornicky, 2001	56.8976	108.105	136.554	3.70585	0	0	0	0	0	0	681.35	126.924	151.54	700.906	469.444	722.222	155.438	85.5432	119.969	438.148	27.3843	73.973	158.8	41.7284
Chromist	Cryptophyceae	Unicellular	Plagioselmis sp. Butcher ex G.Novarino, I.A.N.Lucas & S.Morrall, 1994	0	0	0	0	81.3703	0	0	0	199.23	0	792.839	0	0	0	0	0	0	0	0	784.528	0	0	0	0
Chromist	Cryptophyceae	Unicellular	Rhodomonas salina (Wislouch) D.R.A.Hill & R.Wetherbee, 1989	1.00839	0	0	0	10.4321	0	0	0	4.54	0	13.4083	0	52.7095	242.468	148.657	71.1279	18.7778	42.7716	52.1605	12.25	57.3765	14.6836	51.9144	47.9876
Chromist	Cryptophyceae	Unicellular	Nanoplanktonic Cryptophyceae unicellular	0	0	0	0	0	0	0	0	65533.8	0	0	0	0	0	0	19393.8	0	0	0	57863.6	0	0	0	0
Chromist	Cryptophyceae	Colonial	Nanoplanktonic Cryptophyceae colonial	0	0	0	0	0	0	0	0	0	0	0	0	0	0	0	412.937	0	0	0	0	0	0	0	0
Chromist	Dinophyceae	Unicellular	Akashiwo sanguinea (K.Hirasaka) G.Hansen & Ø.Moestrup, 2000	1.00839	0.328132	0	3.39433	0	1.09812	3.79349	3.12963	0	0	0.211763	3.47737	1.09812	6.32943	9.09016	1.48981	4.17284	0	5.21605	0	0	0	0	0
Chromist	Dinophyceae	Unicellular	Alexandrium sp. Halim, 1960	0	11.3795	0.900756	0	0	0	0	0	0	0	0	0	0	0	0	0	0	0	0	0	0	0	0	0
Chromist	Dinophyceae	Unicellular	Amphidinium sp. Claperède & Lachmann, 1859	0	0	0	0	0	0	0	0	0	0	0	0	0	0	0	0	0	3.12963	21.9074	0	6.52006	0	0	8.34568
Chromist	Dinophyceae	Unicellular	Blepharocysta splendor maris (Ehrenberg) Ehrenberg	0	11.3795	2.0267	0	0	0	0	0	0	0	0	0	0	0	0	0	0	0	0	0	0	0	0	0
Chromist	Dinophyceae	Unicellular	Ceratium fusus (Ehrenberg) Dujardin, 1841	0	0	0	0	0	0	0	0	0.529407	0	0	0	0	0	0	0	0	0	0	0	0	0	0	0
Chromist	Dinophyceae	Unicellular	Dinophysis norvegica Claparède & Lachmann, 1859	0	0	0	0	0	1.09812	0	0	0	0	0	0	0	0	0	0	0	0	0	0	0	0	0	0
Chromist	Dinophyceae	Unicellular	Dinophysis punctata Jörgensen, 1923	0	0	0	3.3061	0	0	0	0	0	0	0	0	0	0	0	0	0	0	0	0	0	0	0	0
Chromist	Dinophyceae	Unicellular	Dinophysis sacculus Stein	0	0	0.112594	0	0	0	0	0	0	0	0	0	0	0	0	0	0	0	0	0	0	0	0	0
Chromist	Dinophyceae	Unicellular	Diplopsalis lenticula Bergh	0	0	5.68976	0.176469	0	0	0	0	0	0	0	0	0	0	0	0	0	0	0	0	0	0	0	0
Chromist	Dinophyceae	Unicellular	Glenodinium rotundum (Lebour) J.Schiller 1935	0	0	0	0	0	0	0	0	0	0	0	0	0	0	0	0	0	0	0	0	0	0.948372	0	0
Chromist	Dinophyceae	Unicellular	Gonyaulax spinifera (Claparède & Lachmann) Diesing, 1866	11.3795	0.984397	1.57632	1.21968	0	0	0	0	0	0	0	1.73868	0	0	0	0	0	0	0	0	0	0	0	0
Chromist	Dinophyceae	Unicellular	Gymnodinium amphora Kofoid & Swezy, 1921	0	0	0	0	0	0	4.74186	3.12963	0	0	0	1.73868	1.09812	0	0	0	0	2.08642	10.4321	0	5.21605	0	0	8.34568
Chromist	Dinophyceae	Unicellular	Gymnodinium sp. pl. F.Stein, 1878	0	0.328132	0	34.151	28.2249	26.3548	10.4321	10.4321	566.898	0	136.761	126.924	38.434	160.539	437.476	178.648	50.0741	59.4629	240.981	294.9	54.7685	37.7016	307.157	114.753
Chromist	Dinophyceae	Unicellular	Gyrodinium sp. Kofoid & Swezy, 1921	0	0	0.450378	0	0	0	0	0	0	0	4.46942	5.21605	12.0793	8.9736	24.5818	4.61	14.6049	0	0	0	1.30401	0.948372	0	2.08642
Chromist	Dinophyceae	Unicellular	Gyrodinium fusiforme Kofoid & Swezy, 1921	0	3.28132	0.675567	1.66085	0	0	0	0	14.2256	10.4321	11.91	55.6378	17.5698	9.75137	2.88672	4.33	1.04321	11.4753	2.08642	63.12	0	0	0	2.08642
Chromist	Dinophyceae	Unicellular	Gyrodinium spirale (Bergh) Kofoid & Swezy, 1921	0	0	0	0	0	0	0	0	0.529407	0	8.34568	0	0	13.501	13.3162	3.55	5.21605	3.12963	21.9074	0	0	0.893884	0	0
Chromist	Dinophyceae	Unicellular	Gyrodinium sp. nanoplanktonic Kofoid & Swezy, 1921	0	0	0	0	0	0	0	0	0	0	0	0	0	13.1739	0	0	0	0	0	0	0	0	0	0
Chromist	Dinophyceae	Unicellular	Heterodinium sp. Kofoid, 1906	0	0	0	0	0.605037	0	0	0	0	0	0	0	0	0	0	0	0	0	0	0	0	0	0	0
Chromist	Dinophyceae	Unicellular	Histioneis subcarinata Rampi, 1947	0	0	0	0	0	0	0	0	2.37093	0	0	0	0	0	0	0	0	0	0	0	0	0	0	0
Chromist	Dinophyceae	Unicellular	Katodinium fungiforme (Anissimova) Fott, 1957	0	187.762	119.485	2.26289	0	0	1.89674	1.04321	0	0	0	6.95473	12.0793	0	0	0	17.7346	6.25926	36.5123	0	0	0	0	0
Chromist	Dinophyceae	Unicellular	Katodinium glaucum (Lebour) Loeblich III, 1965	0	0	0	2.8235	0	0	0	0	0	0	0.635288	0	0	0	0	0	0	7.30247	7.30247	0	6.52006	0	0	12.5185
Chromist	Dinophyceae	Unicellular	Katodinium sp. Fott, 1957	0	0	0	0	0	0	0	0	0	0	1.27058	0	0	0	0	0	0	0	0	0	0	0	0	0
Chromist	Dinophyceae	Unicellular	Parvodinium umbonatum (Stein) S.Carty, 2008	0	0	0	0	0	0	0	0	0	0	0	0	0	0	0	0	0	0	0	0	0	0	0	0
Chromist	Dinophyceae	Unicellular	Peridinium conicum (Gran) Ostenfeld & Schmidt, 1902	0	0	0	0.882345	0	0	0	0	0	0	0	0	0	0	0	0	0	0	0	0	0	0	0	0
Chromist	Dinophyceae	Unicellular	Peridinium sp. Ehrenberg, 1830	0	0	0	13.2556	0	4.39246	0	0	2.37093	0	12.942	52.1605	0	2.32804	0	6.98	10.4321	1.04321	11.4753	0	11.7361	0.893884	1.15912	6.25926
Chromist	Dinophyceae	Unicellular	Polykrikos sp. Bütschli, 1873	0	0	0	0	1.22	0	0	0	10.4321	20.8642	4.17284	0	0	0.352879	0	0	0	1.04321	0	0	0	0	0	0
Chromist	Dinophyceae	Unicellular	Polykrikos schwartzii Bütschli, 1873	0	0.328132	0.225189	3.23347	0	0	0	1.04321	0	0	0	0	0	0	0	0	0	0	0	0	0	0	0	0
Chromist	Dinophyceae	Unicellular	Podolampas bipes Stein	0	0	0.112594	0	0	0	0	0	0	0	0	0	0	0	0	0	0	0	0	0	0	0	0	0
Chromist	Dinophyceae	Unicellular	Podolampas palmipes Stein, 1883	0	5.68976	0	0	0	0	0	0	0	0	0	0	0	0	0	0	0	0	0	0	0	0	0	0
Chromist	Dinophyceae	Unicellular	Podolampas sp. F.Stein, 1883	0	0	0.225189	0	0	0	0	0	0	0	0	0	0	0	0	0	0	0	0	0	0	0	0	0
Chromist	Dinophyceae	Unicellular	Prorocentrum balticum (Lohmann) Loeblich, 1970	0	0	0	0.882345	14.0671	0	0.948372	0	0	0	0	0	5.49058	0.940931	0	0	4.17284	1.04321	3.12963	0	9.12808	0	1.27698	14.6049
Chromist	Dinophyceae	Unicellular	Prorocentrum compressum (J.W.Bailey) Abé ex J.D.Dodge, 1975	0	0	0	0	20.8642	0	0	0	16.39	0	2.19	0	0	0	0	10.53	0	0	0	2.11763	0	0	0	0
Chromist	Dinophyceae	Unicellular	Prorocentrum gracile Schütt, 1895	0	0	0	2.08642	0	2.19623	2.84512	0	0.529407	0	4.17284	0	0	1.05881	1.32352	2.07	0	1.04321	0	0	0	0	0	0
Chromist	Dinophyceae	Unicellular	Prorocentrum micans Ehrenberg, 1834	0	24.6099	23.87	45.4762	2.08642	0	0	0	10.4321	0	10	19.1255	15.3736	4.7778	13.6849	11.39	16.6914	13.5617	19.821	1.05881	0	0	0.705876	0
Chromist	Dinophyceae	Unicellular	Prorocentrum minimum (Pavillard, 1916) J.Schiller, 1933	0	0	0	0.176469	8.77303	31.8453	40.78	28.1667	0	0	0	0	0	0	0	0	0	0	0	0	0	0	0	0
Chromist	Dinophyceae	Unicellular	Prorocentrum triestinum J.Schiller, 1918	0	0	0	0.352938	0	0	0	0	0	0	0	0	0	0	0	0	0	0	0	0	0	0	0	0
Chromist	Dinophyceae	Unicellular	Prorocentrum nanum J.Schiller, 1918	0	0	0	0	3.02518	0	0	0	2.37093	0	0	0	0	0	0	0	0	0	0	0	0	0	0	0
Chromist	Dinophyceae	Unicellular	Protoperidinium applanatum (Mangin) Balech, 1974	0	0	0	0	0.151259	0	0	0	0	0	0	0	0	0	0	0	0	0	0	0	0	0	0	0
Chromist	Dinophyceae	Unicellular	Protoperidinium claudicans (Paulsen, 1907) Balech, 1974	0	0	0	0	0	0	0	0	0	0	4.46942	0	0	0	0	0	0	0	0	0	0	0	0	0
Chromist	Dinophyceae	Unicellular	Protoperidinium divergens (Ehrenberg) Balech, 1974	0	0	0	0	0	0	0	0	0	0	0	0	0	0	0	0	0	0	0	0	0	0	0.117646	0
Chromist	Dinophyceae	Unicellular	Protoperidinium steinii (Jørgensen, 1899) Balech, 1974	0	0	0	0	0	0	0	0	0	0	0	0	0	0	0	9	0	0	0	0	0	0	0	0
Chromist	Dinophyceae	Unicellular	Protoperidinium sp. Bergh, 1882	0	0	0	0	0	1.09812	0.948372	0	75.8698	0	0	1.73868	0	0	0	0	0	0	0	0	0	0	0	2.08642
Chromist	Dinophyceae	Unicellular	Protopsis ochrea (Wright) Kofoid & Swezy, 1921	0	0	0	0	0	0	0	0	0	0	0	0	0	0	0	0	0	0	2.08642	0	0	0	0	0
Chromist	Dinophyceae	Unicellular	Spirodinium fusus Meunier, 1910	0	0	0	0.705876	0	0	0	0	0	0	0	0	0	0	0	0	0	0	0	0	0	0	0	0
Chromist	Dinophyceae	Unicellular	Tripos furca (Ehrenberg) F.Gómez, 2013	6.32	0.984397	0.450378	1.39615	0	0	0	0	5.86	10.4321	0.423526	1.73868	1.09812	0.470465	0.264703	0	0	2.08642	0	1.51259	1.30401	0	1.63837	2.08642
Chromist	Cyanophyceae	Filamentous	Arthrospira sp. Sitzenberger ex Gomont, 1892	0	0	0	0	0	0	0	0	0	0	0	0	0	0	0	0	1.04321	0	0	0	0	0	0	0
Chromist	Cyanophyceae	Filamentous	Small cyanobacteria	0	0	0	0	0	0	0	0	0	0	0	0	0	1.52071	0	0	0	0	0	0	0	0	0	0
Chromist	Cyanophyceae	Filamentous	Small filamentous cyanobacteria	0	0	0	0	0	0	0	0	4.29	0	0	0	0	7.33779	0	0	0	2.08642	1.04321	0	1.30401	0	0	0
Chromist	Cyanophyceae	Colonial	Chroococcus dispersus (Keissler) Lemmermann	0	11.3795	0	0	0	0	0	0	0	0	0	0	0	0	0	0	0	0	0	0	0	0	0	0
Chromist	Cyanophyceae	Filamentous	Spirulina subsalsa Oersted ex Gomont, 1892	0	0	0	0	0	0	1.89674	0	14.95	0	4.17284	0	0	0	0	0	0	2.08642	0	0	0	0	0	0
Chromist	Cyanophyceae	Unicellular/Colonial	Synechococcus C.Nägeli, 1849	0	0	0	5216.05	0	2086.42	2086.42	2086.42	0	7302.47	0	3129.63	2086.42	0	0	0	2086.42	2086.42	0	0	2608.02	0	0	1564.81
Chromist	Diphylleida	Unicellular	Collodictyon sp. H.J.Carter, 1865	34.1385	0	0	0	0	0	0	0	0	0	0	0	0	0	0	0	0	0	0	0	0	0	0	0
Plantae	Chlorophyceae	Unicellular	Cymbomonas sp. J.Schiller, 1913	0	73.9668	17.0693	0	0	0	1.89674	0	0	0	0	0	0	0	0	0	0	0	0	0	0	0	0	0
Plantae	Chlorophyceae	Unicellular	Pediastrum sp. Meyen, 1829	0	0	0	0	0	0	0	0	0	0	0	0	0	0	0	0	0	0	35.4691	0	0	0	0	0
Plantae	Chlorophyceae	Unicellular	Phaeocystis sp. Lahergeim, 1893	0	204.831	165.003	0	0	0	0	0	0	0	0	0	0	0	0	0	0	0	0	0	0	0	0	0
Plantae	Chlorophyceae	Unicellular	Tetraselmis sp. F.Stein, 1878	0	17.0693	5.68976	0	0	0	0	0	0	0	0	0	0	0	0	0	0	0	0	0	0	0	0	0
Plantae	Chlorophyceae	Unicellular	Nanoplanktonic Chlorophyceae	0	1308.64	1490.72	1068.25	0	1045.41	586.094	628.012	0	4903.08	0	3621.68	1496.73	0	0	0	4017.4	4728.87	6231.09	0	0	0	0	6.25926
Plantae	Conjugatophyceae (Zygnematophyceae)	Unicellular	Euastrum sp. Ehrenberg ex Ralfs, 1848	0.403358	0	0	0	0	0	0	0	0.53	0	0	0	0	0	0	0	0	0	0	0	0	0	0.941168	0
Plantae	Pedinophyceae	Unicellular	Staurastrum paradoxum Meyen ex Ralfs, 1848	341.385	244.66	244.66	0	0	0	0	0	0	0	0	0	0	0	0	0	0	0	0	0	0	0	0	0
Plantae	Conjugatophyceae (Zygnematophyceae)	Colonial	Scourfieldia complanata G.S.West, 1912	0	0	0	0	0	0	0	0	0	0	0	0	0	0	0	0	0	1.04321	0	0	0	0	0	0
Bacteria		Unicellular	Bacterioplankton	0	0	0	0	0	0	13.2772	0	0	0	0	0	0	9562.75	10934.7	0	0	0	0	0	0	40826	34676.3	0
Bacteria	Flavobacteria	Filamentous	Flavobacterium sp. Bergey, 1923	0	0	0	0	0	0	0	0	0	0	0	0	0	0	0	0	0	0	0	0	4779.2	0	0	4494.15
Protozoa	Euglenophyceae	Unicellular	Euglena sp. Ehrenberg, 1830	0	0	0	2.08642	0	0	0	4.17284	0	0	0	0	0	0	0	0	0	0	0	0	0	0	0	0
Protozoa	Euglenophyceae	Unicellular	Euglena viridis Ehrenberg, 1830	0	0	0.225189	0	0	0	2.84512	0	0	0	0	0	0	0	0	0	0	0	0	0	0	0	0	0
Protozoa	Thecofilosea	Unicellular	Hermesinum adriaticum O.Zacharias, 1906	0	0	0	3.39433	0.151259	7.68681	0	0	186.31	31.2963	0	0	0	0	0	0	7.30247	0	2.08642	0	0	0	0	0
			TOTAL	7625.11	2651.16	2535.7	8936.87	527.387	3919.17	3024.36	4072.69	67334.7	20666	2743.21	7598.04	4111.34	11074	12862.8	21567.7	7521.54	8310.21	8293.52	60219.1	8554.32	41578.7	36274.2	7857.45
